# Supplementary material
Source: publisher site journal article supplement (https://www.dovepress.com/article/309570)
Supplement: Supplementary file 1 [file get_supplementary_file.php]

**Supplementary Tables**

**Table S1. Baseline characteristics of hepatocellular carcinoma patients without macrovascular invasion for predicting postoperative relapse.**

| Variables | Without relapse (n = 179) | Relapse  (n = 144) | Univariable Cox | | Multivariable Cox | |
| --- | --- | --- | --- | --- | --- | --- |
| HR (95% CI) | P | HR (95% CI) | P |
| Age(y, mean ± SD) | 53.66 ± 11.146) | 55.78 ± 10.722 | 1.015(0.999-1.031) | **0.068** |  |  |
| Sex(Male/Female) | 158(48.9)/21(6.5) | 122(37.8)/22(6.8) | 0.842(0.535-1.328) | 0.460 |  |  |
| HBV or HCV † | 159(49.2)/20(6.2) | 123(38.1)/21(6.5) | 0.743(0.467-1.182) | 0.210 |  |  |
| HBV-DNA (>104/≤104) | 23(7.7)/146(48.7) | 22(7.3)/109(36.3) | 1.382(0.874-2.187) | 0.167 |  |  |
| ES grade (III-IV/I-II) | 66(20.4)/113(35.0) | 62(19.2)/82(25.4) | 1.330(0.955-1.853) | **0.092** |  |  |
| Cirrhosis † | 115(35.6)/64(19.8) | 92(28.5)/52(16.1) | 0.947(0.673-1.332) | 0.755 |  |  |
| MVI † | 38(11.8)/141(43.7) | 50(15.5)/94(29.1) | 1.777(1.258-2.511) | **0.001** |  |  |
| Ki-67 | 24.59 ± 17.390 | 25.55 ± 18.894 | 1.005(0.996-1.014) | 0.259 |  |  |
| Size(>5 cm/≤5 cm) | 3(0.9)/176(54.5) | 15(4.6)/129(39.9) | 4.686(2.721-8.069) | **<0.001** | 3.749(2.082-6.752) | <0.001 |
| Multifocality † | 28(8.7)/151(46.7) | 30(9.3)/114(35.3) | 1.311(0.872-1.972) | 0.193 |  |  |
| Satellite nodules † | 1(0.3)/178(55.1) | 4(1.2)/140(43.3) | 5.428(1.996-14.762) | **0.001** |  |  |
| AFP(>20/≤20 ng/mL) (>400/≤400ng/mL) | 72(22.3)/107(33.1) 18(5.6)/161(49.8) | 72(22.3)/72(22.3) 21(6.5)/123(8.1) | 1.382(0.995-1.918) 1.261(0.793-2.005) | **0.053** 0.327 |  |  |
| CEA (>5/≤5 ng/mL) | 16(5.0)/161(50.5) | 13(4.1)/129(40.4) | 0.995(0.562-1.763) | 0.987 |  |  |
| CA199(>34/≤34ng/mL) | 30(9.4)/147(46.1) | 32(10.0)/110(34.5) | 1.410(0.950-2.092) | **0.088** |  |  |
| TP(≤65/>65 g/L) | 46(14.2)/133(41.2) | 39(12.1)/105(32.5) | 0.926(0.640-1.340) | 0.926 |  |  |
| ALB(≤35/>35g/L) | 3(0.9)/176(54.5) | 4(1.2)/140(43.3) | 1.585(0.586-4.289) | 0.364 |  |  |
| TBA(>10/≤10 umol/L) | 59(18.7)/115(36.5) | 62(19.7)/79(25.1) | 1.471(1.053-2.055) | **0.024** |  |  |
| TBIL(>20.4/≤20.4 µmol/L) | 21(6.5)/158(48.9) | 17(5.3)/127(39.3) | 1.171(0.705-1.946) | 0.543 |  |  |
| DBIL(>6.8/≤6.8 umol/L) | 35(10.8)/144(44.6) | 30(9.3)/114(35.3) | 1.148(0.767-1.718) | 0.503 |  |  |
| ALT(>50/≤50 U/L) | 20(6.2)/159(49.2) | 33(10.2)/111(34.4) | 1.933(1.307-2.858) | **0.001** | 1.782(1.151-2.761) | 0.010 |
| AST(>40/≤40 U/L) | 24(7.4)/155(48.0) | 35(10.8)/109(33.7) | 1.763(1.204-2.583) | **0.004** |  |  |
| AKP(>125/≤125 U/L) | 10(3.1)/169(52.3) | 14(4.3)/130(40.2) | 1.879(1.081-3.267) | **0.025** | 2.142(1.193-3.848) | 0.011 |
| GGT(>60/≤60 U/L) | 46(14.2)/133(41.2) | 48(14.9)/96(29.7) | 1.370(0.968-1.939) | **0.076** |  |  |
| PLT(≤100/>100 x 109/L) | 47(14.6)/131(40.7) | 39(12.1)/105(32.6) | 1.076(0.745-1.555) | 0.696 |  |  |
| PT(>13.0/≤13.0 s) | 24(7.4)/155(48.0) | 20(6.2)/124(38.4) | 1.119(0.697-1.796) | 0.642 |  |  |
| PALB(≤250/>250mg/L) | 126(39.0)/53(16.4) | 113(35.0)/31(9.6) | 1.454(0.977-2.16) | **0.065** |  |  |
| Non-smooth edge † | 74(22.9)/105(2.5) | 78(24.1)/66(20.4) | 1.383(0.995-1.923) | **0.053** |  |  |
| Nodule-in-nodule † | 9(2.8)/170(52.6) | 9(2.8)/135(41.8) | 1.103(0.61-2.168) | 0.776 |  |  |
| Fat suppression † | 54(16.7)/125(38.7) | 49(15.2)/95(29.4) | 1.109((0.764-1.566) | 0.559 |  |  |
| Necrosis † | 45(13.9)/134(41.5) | 40(12.4)/104(32.2) | 1.045(0.725-1.506) | 0.814 |  |  |
| Heterogenous T2WI † | 47(14.6)/132(40.9) | 47(14.6)/97(30.0) | 1.137(0.802-1.613) | 0.471 |  |  |
| Child-Pugh(B/A class) | 5(1.5)/174(53.9) | 10(3.1)/134(41.5) | 1.834(0.963-3.490) | **0.065** |  |  |
| BCLC 0 stage A stage B stage | 66(20.4) 107(33.1) 6(1.9) | 30(9.3) 98(30.3) 16(5.0) | Reference 1.818(1.205-2.743) 3.431(1.866-6.310) | **<0.001** 0.004 <0.001 |  |  |
| TNM stage T1a  T1b  T2  T3 | 109(33.7) 25(7.7) 44(13.6) 1(0.3) | 70(21.7) 20(6.2) 49(15.2) 5(1.5) | Reference 1.222(0.743-2.009) 1.606(1.112-2.320) 6.465(2.584-16.174) | **<0.001** 0.430 0.012 <0.001 |  |  |
| ERASL-pre risk low intermediate  high | 177(54.8) 2(0.6) 0(0) | 132(40.9) 10(3.1) 2(0.6) | Reference 3.705(1.940-7.078) 4.035(0.996-16.349) | **<0.001** <0.001 0.051 |  |  |
| ERASL-post risk low intermediate  high | 172(53.3) 7(2.5) 0(0) | 122(37.8) 20(6.2) 2(0.6) | Reference 2.632(1.637-4.232) 4.199(1.035-17.025) | **<0.001** <0.001 0.045 |  |  |
| Hemorrhage † | 22(6.8)/157(48.6) | 30(9.3)/114(35.3) | 1.559(1.042-2.332) | **0.031** |  |  |
| Mosaic architecture † | 9(2.8)/170(52.6) | 13(4.0)/131(40.6) | 1.723(0.974-3.050) | **0.062** |  |  |
| Targetoid architecture † | 10(3.1)/169(52.3) | 12(3.7)/132(40.9) | 1.187(0.656-2.148) | 0.572 |  |  |
| Non-rim APHE † | 145(44.9)/34(10.5) | 115(35.6)/29(9.0) | 0.959(0.634-1.450) | 0.843 |  |  |
| Non-peripheral washout † | 139(43.0)/40(12.4) | 117(36.2)/27(8.4) | 1.167(0.767-1.775) | 0.470 |  |  |
| Capsule enhancement intact incomplete absent | 110(34.1) 31(9.6) 38(11.8) | 69(21.4) 45(13.9) 30(9.3) | Reference 1.868(1.280-2.725) 1.285(0.835-1.976) | **0.005**  0.001 0.254 |  |  |
| Peritumoral enhancement † | 46(14.2)/133(41.2) | 66(20.4)/78(24.1) | 1.941(1.396-2.698) | **<0.001** | 1.914(1.327-2.760) | 0.001 |
| Peritumoral hypointensity † | 33(10.2)/146(45.2) | 50(15.5)/94(29.1) | 1.942(1.375-2.743) | **<0.001** |  |  |
| HBP hypointensity † | 175(54.2)/4(1.2) | 140(43.3)/4(1.2) | 1.019(0.377-2.754) | 0.971 |  |  |
| Ascite † | 9(2.8)/170(52.6) | 12(3.7)/132(40.9) | 1.430(0.790-2.586) | 0.238 |  |  |
| LI-RADS LR-3 LR-4 LR-5 | 27(8.4) 44(13.6) 108(33.4) | 12(3.7) 39(12.1) 93(28.8) | Reference 1.482(0.774-2.837) 1.520(0.833-2.774) | 0.392 0.235 0.173 |  |  |

† presence /absence; Bold P values indicated that the corresponding variables were closely related to postoperative recurrence in the univariable Cox regression (P <0.1); Abbreviations: odd ratio (OR), confidence interval (CI), hepatitis B virus (HBV), hepatitis C virus (HCV), deoxyribonucleic acid of hepatitis B virus (HBV-DNA), Edmondson-Steiner grade(ES), microvascular invasion (MVI), alpha-fetoprotein (AFP), carcinoembryonic antigen (CEA), carbohydrate antigen19-9 (CA199), Total protein (TP), albumin (ALB), total bile acid (TBA), total bilirubin (TBIL), direct bilirubin (DBIL), alanine aminotransferase (ALT), aspartate aminotransferase (AST), alkaline phosphatase (AKP), γ-glutamyl transpeptidase (GGT), platelet (PLT), prothrombin time (PT), prealbumin(PALB), the albumin-bilirubin grade (ALBI), T2-weighted image (T2WI), the Barcelona Clinic Liver Cancer (BCLC) staging system, the American Joint Committee on Cancer tumor-node-metastasis (TNM) system, the preoperative and postoperative risks of Early Recurrence After Surgery for Liver tumor (ERASL-pre risk, ERASL-post risk), arterial phase hyperenhancement (APHE), hepatobiliary phase (HBP), the Liver Imaging Reporting And Data System (LI-RADS).

**Table S2. Parameters of enrolled MR sequences**

| Parameters | TR  (millisecond) | TE  (millisecond) | Bandwidth (Hz/pixel) | FOV  (mm) | Matrix | Section thickness  (mm) | Acquisition  time  (second) |
| --- | --- | --- | --- | --- | --- | --- | --- |
| Respiratory-triggered T2-weighted imaging | 4918 | 106 | 195 | 285x380 | 384x273 | 5.5 | Respiration-  dependent |
| Free-breathing DWI † | 5100 | 55 | 1565 | 285x380 | 192x154 | 5.5 | 74 |
| Breath-hold T1-weighted VIBE imaging | 3.47 | 1.36 | 400 | 308x380 | 320x240 | 3 | 15 |

1. Abbreviations: TR, Repetition time; TE, Echo time; FOV, Field of view; DWI, Diffusion-weighted Imaging; VIBE, Volumetric interpolated breath-hold examination;
2. † DWI was performed with b values of 0 and 500 second/mm2.

**Table S3. The extracted radiomics features in this study.**

| Non-texture Features (n=43) | |
| --- | --- |
| Feature category | Features |
| First Order (n=19) | Energy; Total Energy; Entropy; Minimum; 10th percentile; 90th percentile; Maximum; Mean; Median; Interquartile Range; Range; Mean Absolute Deviation; Robust Mean Absolute Deviation; Root Mean Squared; Standard Deviation; Skewness; Kurtosis; Variance; Uniformity |
| Shape and Size (n=24) | Mesh Volume; Voxel Volume; Surface Area; Surface Area to Volume ratio; 3D Sphericity; 3D Spherical Disproportion; Compactness 1; Compactness 2; Maximum 3D diameter; Maximum 2D diameter; 3D Major Axis Length; 3D Minor Axis Length; Least Axis Length; 3D Elongation; Flatness; Mesh Surface; Pixel Surface; Perimeter; Perimeter to Surface ratio; 2D Sphericity; 2D Spherical Disproportion; 2D Major Axis Length; 2D Minor Axis Length; 2D Elongation |
| Textural Features (n=75) | |
| Gray Level Co-occurrence Matrix (GLCM, n=24) | Autocorrelation; Joint Average Cluster Prominence; Cluster Shade; Cluster Tendency; Contrast; Correlation; Difference Average; Difference Entropy; Difference Variance; Joint Energy; Joint Entropy; Informational Measure of Correlation 1; Informational Measure of Correlation 2; Inverse Difference Moment; Maximal Correlation Coefficient; Inverse Difference Moment Normalized; Inverse Difference; Inverse Difference Normalized; Inverse Variance; Maximum Probability; Sum Average; Sum Entropy; Sum of Squares |
| Gray Level Run Length Matrix Features  (GLRLM, n=16) | Short Run Emphasis; Long Run Emphasis; Gray Level Non-Uniformity; Gray Level Non-Uniformity Normalized; Run Length Non-Uniformity; Run Length Non-Uniformity Normalized; Run Percentage; Gray Level Variance; Run Variance; Run Entropy; Low Gray Level Run Emphasis; High Gray Level Run Emphasis; Short Run Low Gray Level Emphasis ; Short Run High Gray Level Emphasis; Long Run Low Gray Level Emphasis; Long Run High Gray Level Emphasis |
| Gray Level Size Zone Matrix (GLSZM, n=16) | Small Area Emphasis; Large Area Emphasis; Gray Level Non-Uniformity; Gray Level Non-Uniformity Normalized; Size-Zone Non-Uniformity; Size-Zone Non-Uniformity Normalized; Zone Percentage; Gray Level Variance; Zone Variance; Zone Entropy; Low Gray Level Zone Emphasis; High Gray Level Zone Emphasis; Small Area Low Gray Level Emphasis; Small Area High Gray Level Emphasis; Large Area Low Gray Level Emphasis; Large Area High Gray Level Emphasis |
| Neighboring Gray Tone Difference Matrix (NGTDM, n=5) | Coarseness; Contrast;  Busyness; Complexity;  Strength |
| Gray Level Dependence Matrix (GLDM, n=14) | Small Dependence Emphasis; Large Dependence Emphasis; Gray Level Non-Uniformity; Dependence Non-Uniformity; Dependence Non-Uniformity Normalized; Gray Level Variance; Dependence Variance; Dependence Entropy; Low Gray Level Emphasis; High Gray Level Emphasis; Small Dependence Low Gray Level Emphasis; Small Dependence High Gray Level Emphasis; Large Dependence Low Gray Level Emphasis; Large Dependence High Gray Level Emphasis |

**Table S4. The mean AUC of single sequences in predicting 2-year recurrence with support vector machine.**

| Subgroup  Sequence  (Feature number) | | 1st  (TD/VD) | 2nd  (TD/VD) | 3rd  (TD/VD) | 4th  (TD/VD) | 5th  (TD/VD) | Mean  (TD/VD) |
| --- | --- | --- | --- | --- | --- | --- | --- |
| VOItumor | T2(32) † | 0.816/0.699 | 0.795/0.777 | 0.802/0.767 | 0.798/0.773 | 0.816/0.686 | 0.804/0.738 |
| DWI(21) ‡ | 0.775/0.656 | 0.766/0.674 | 0.779/0.652 | 0.764/0.623 | 0.765/0.638 | 0.769/0.648 |
| Pre(20) † | 0.723/0.671 | 0.720/0.686 | 0.709/0.734 | 0.730/0.657 | 0.741/0.574 | 0.724/0.663 |
| AP(22) § | 0.771/0.750 | 0.762/0.787 | 0.793/0.678 | 0.787/0.736 | 0.812/0.656 | 0.784/0.720 |
| PVP(28) ‡ | 0.712/0.708 | 0.750/0.674 | 0.728/0.598 | 0.696/0.721 | 0.722/0.670 | 0.721/0.673 |
| TP(24) § | 0.829/0.826 | 0.853/0.731 | 0.865/0.667 | 0.845/0.781 | 0.840/0.818 | 0.846/0.764 |
| HBP(22) † | 0.787/0.643 | 0.794/0.592 | 0.795/0.576 | 0.759/0.738 | 0.753/0.681 | 0.777/0.645 |
| 7 sequences(41) † | 0.932/0.787 | 0.919/0.883 | 0.947/0.768 | 0.920/0.862 | 0.929/0.824 | 0.927/0.823 |
| VOItumor+1cm | T2(33) † | 0.777/0.812 | 0.813/0.668 | 0.801/0.703 | 0.801/0.748 | 0.816/0.696 | 0.800/0.722 |
| DWI(20) ‡ | 0.768/0.818 | 0.790/0.727 | 0.815/0.582 | 0.794/0.661 | 0.768/0.791 | 0.787/0.715 |
| Pre(25) † | 0.761/0.739 | 0.770/0.688 | 0.776/0.655 | 0.759/0.744 | 0.757/0.731 | 0.764/0.710 |
| AP(25) § | 0.832/0.815 | 0.862/0.652 | 0.832/0.792 | 0.841/0.727 | 0.845/0.758 | 0.840/0.748 |
| PVP(22) ‡ | 0.785/0.713 | 0.800/0/632 | 0.755/0.778 | 0.769/0.726 | 0.791/0.635 | 0.779/0.696 |
| TP(22) § | 0.780/0.809 | 0.835/0.645 | 0.806/0.763 | 0.799/0.781 | 0.804/0.679 | 0.805/0.735 |
| HBP(24) † | 0.819/0.832 | 0.843/0.710 | 0.853/0.650 | 0.841/0.698 | 0.835/0.758 | 0.838/0.729 |
| HBP+T2(38) ¶ | 0.880/0.779 | 0.894/0.740 | 0.884/0.796 | 0.875/0.779 | 0.877/0.734 | 0.881/0.764 |
| HBP+T2+AP(33) † | 0.995/0.777 | 0.991/0.789 | 0.991/0.749 | 0.993/0.756 | 0.992/0.781 | 0.988/0.769 |
| HBP+T2+DWI(39) # | 0.888/0.795 | 0.897/0.784 | 0.894/0.818 | 0.910/0.647 | 0.915/0.722 | 0.899/0.752 |
| HBP+T2+DWI+AP(33) # | 0.840/0.718 | 0.840/0.758 | 0.829/0.749 | 0.846/0.688 | 0.848/0.711 | 0.839/0.723 |
| 7 sequences(38) † | 0.941/0.888 | 0.942/0.830 | 0.936/0.873 | 0.933/0.796 | 0.951/0.832 | 0.939/0.842 |

†: Z-score; ‡: Quantile normalization; §: Min-Max normalization; ¶: Max-Abs-Scaler; #: Box-Cox transformation; TD, training dataset; VD, validation dataset.

**Table S5. The 38 features derived from 7-sequence images for radiomics model**

| Sequence | Feature | Coefficient |
| --- | --- | --- |
| PRE | mean_glszm_smallarealowgraylevelemphasis | 0.063026940 |
| HBP | log_glszm_log-sigma-0-5-mm-3d-zonepercentage | -0.046694625 |
| PVP | wavelet_glcm_wavelet-lll-inversevariance | 0.032398097 |
| AP | wavelet_glrlm_wavelet-hlh-longrunlowgraylevelemphasis | 0.031122802 |
| AP | boxsigmaimage_glszm_graylevelnonuniformitynormalized | 0.028851124 |
| PVP | wavelet_gldm_wavelet-lhl-dependencenonuniformitynormalized | 0.028589906 |
| TP | recursivegaussian_glrlm_longrunhighgraylevelemphasis | -0.026405197 |
| HBP | normalize_glszm_zonepercentage | -0.025446266 |
| PRE | mean_shape_sphericity | -0.022902304 |
| AP | log_glrlm_log-sigma-1-0-mm-3d-shortrunlowgraylevelemphasis | -0.021537969 |
| T2WI | normalize_firstorder_range | -0.021385223 |
| AP | wavelet_glszm_wavelet-llh-graylevelnonuniformity | 0.019641412 |
| HBP | wavelet_glszm_wavelet-hlh-sizezonenonuniformity | 0.019222947 |
| AP | log_shape_log-sigma-0-5-mm-3d-maximum2ddiameterslice | 0.018494435 |
| DWI | wavelet_glszm_wavelet-hhl-graylevelnonuniformitynormalized | 0.016252823 |
| T2WI | normalize_firstorder_variance | -0.014519660 |
| T2WI | log_glszm_log-sigma-0-5-mm-3d-lowgraylevelzoneemphasis | -0.013511134 |
| HBP | specklenoise_glszm_zoneentropy | -0.012643132 |
| HBP | discretegaussian_glszm_smallareahighgraylevelemphasis | -0.011534366 |
| T2WI | wavelet_firstorder_wavelet-hhh-median | -0.011411621 |
| PVP | log_glszm_log-sigma-0-5-mm-3d-sizezonenonuniformitynormalized | -0.010852316 |
| DWI | wavelet_glszm_wavelet-hll-zoneentropy | 0.010074567 |
| T2WI | wavelet_glcm_wavelet-hhl-differencevariance | 0.009695678 |
| DWI | original_glszm_graylevelnonuniformitynormalized | -0.009450388 |
| DWI | discretegaussian_ngtdm_strength | 0.008135344 |
| PRE | normalize_glszm_lowgraylevelzoneemphasis | -0.007615824 |
| T2WI | log_firstorder_log-sigma-1-0-mm-3d-skewness | 0.007314865 |
| DWI | binomialblurimage_glszm_sizezonenonuniformity | 0.003569631 |
| HBP | wavelet_glszm_wavelet-hlh-lowgraylevelzoneemphasis | 0.002581748 |
| PRE | wavelet_ngtdm_wavelet-llh-contrast | -0.002221758 |
| TP | log_glszm_log-sigma-1-5-mm-3d-smallareahighgraylevelemphasis | 0.002061082 |
| AP | original_shape_maximum2ddiameterslice | 0.001960430 |
| AP | normalize_gldm_largedependencelowgraylevelemphasis | 0.001584110 |
| HBP | discretegaussian_glszm_smallarealowgraylevelemphasis | 0.000475481 |
| PVP | normalize_glszm_zonepercentage | 0.000152946 |
| AP | boxmean_shape_maximum2ddiameterslice | 6.23e-18 |
| PRE | specklenoise_shape_sphericity | -6.77e-18 |
| PRE | normalize_shape_sphericity | -6.77e-18 |

Abbreviation: T2WI, T2-weighted imaging; DWI, diffusion-weighted imaging; PRE, pre-contrasted phase; AP, arterial phase; PVP, portal venous phase; TP, transitional phase; HBP, hepatobiliary phase.

**Table S6. The sixth most discriminating signatures in peritumoral dilation radiomics model for predicting 2-year recurrence.**

| **Feature (Sequence)** | **Formula** | **Definition** |
| --- | --- | --- |
| Small Area Low Gray Level Emphasis (SALGLE; **PRE**) |  | SALGLE measures the proportion in the image of the joint distribution of smaller size zones with lower gray-level values. |
| Gray Level Non-Uniformity Normalized (GLNN; **AP**) |  | GLNN measures the variability of gray-level intensity values in the image, with a lower value indicating a greater similarity in intensity values. This is the normalized version of the GLN formula. |
| Long Run High Gray Level Emphasis (LRHGLE; **AP**) |  | LRHGLRE measures the joint distribution of long run lengths with higher gray-level values, with a greater value indicating a longer run length and a more coarse structural texture. |
| Dependence Non-Uniformity Normalized (DNN; **PVP**) |  | DNN measures the similarity of dependence throughout the image, with a lower value indicating more homogeneity among dependencies in the image. This is the normalized version of the DLN formula. |
| Inverse Variance (**PVP**) |  | Note that 𝑘=0 is skipped, as this would result in a division by 0. Inverse variance measures the local homogeneity of the target region, with a lower value indicating more uniform gray levels. |
| Zone Percentage (**HBP**) |  | Zone percentage measures the coarseness of the texture by taking the ratio of number of zones and number of voxels in the ROI. Values are in range ≤ zone percentage ≤1, with higher values indicating a larger portion of the ROI consists of small zones (indicates a more fine texture). |

Abbreviation: PRE, pre-contrasted phase; AP, arterial phase; PVP, portal venous phase; HBP, hepatobiliary phase

**Table S7. Multivariate analysis of radiomics score and clinicoradiologic predictors for early recurrence.**

| Variables | Univariate logistic analysis | | Multivariate logistic analysis | |
| --- | --- | --- | --- | --- |
| OR (95% CI) | P | OR (95% CI) | P |
| Radiomics Score | 6.5x1011(1.3x109-3.1x1014) | <0.001 | 4.1x1011 (7.4x108-2.3x1014) | <0.001 |
| Microvascular invasion † | 2.610(1.550-4.394) | <0.001 | 1.810 (0.796-4.115) | 0.157 |
| ALT >50 U/L | 2.232(1.203-4.140) | 0.011 | 1.757 (0.695-4.442) | 0.234 |
| GGT >60 U/L | 1.833(1.095-3.068) | 0.021 | 1.239 (0.566-2.716) | 0.592 |
| Prealbumin ≤250 mg/L | 1.768(0.971-3.217) | 0.062 | 1.248 (0.549-2.837) | 0.597 |
| Peritumoral enhancement † | 2.409(1.462-3.970) | 0.001 | 1.463 (0.667-3.208) | 0.342 |
| Tumor size >5 cm | 7.567(2.614-21.906) | <0.001 | 1.105 (0.198-6.173) | 0.910 |

† presence /absence; Abbreviations: odd ratio, OR; confidence Interval, CI; alanine aminotransferase, ALT; γ-glutamyltransferase, GGT.

**Supplementary Figure Legends**

**
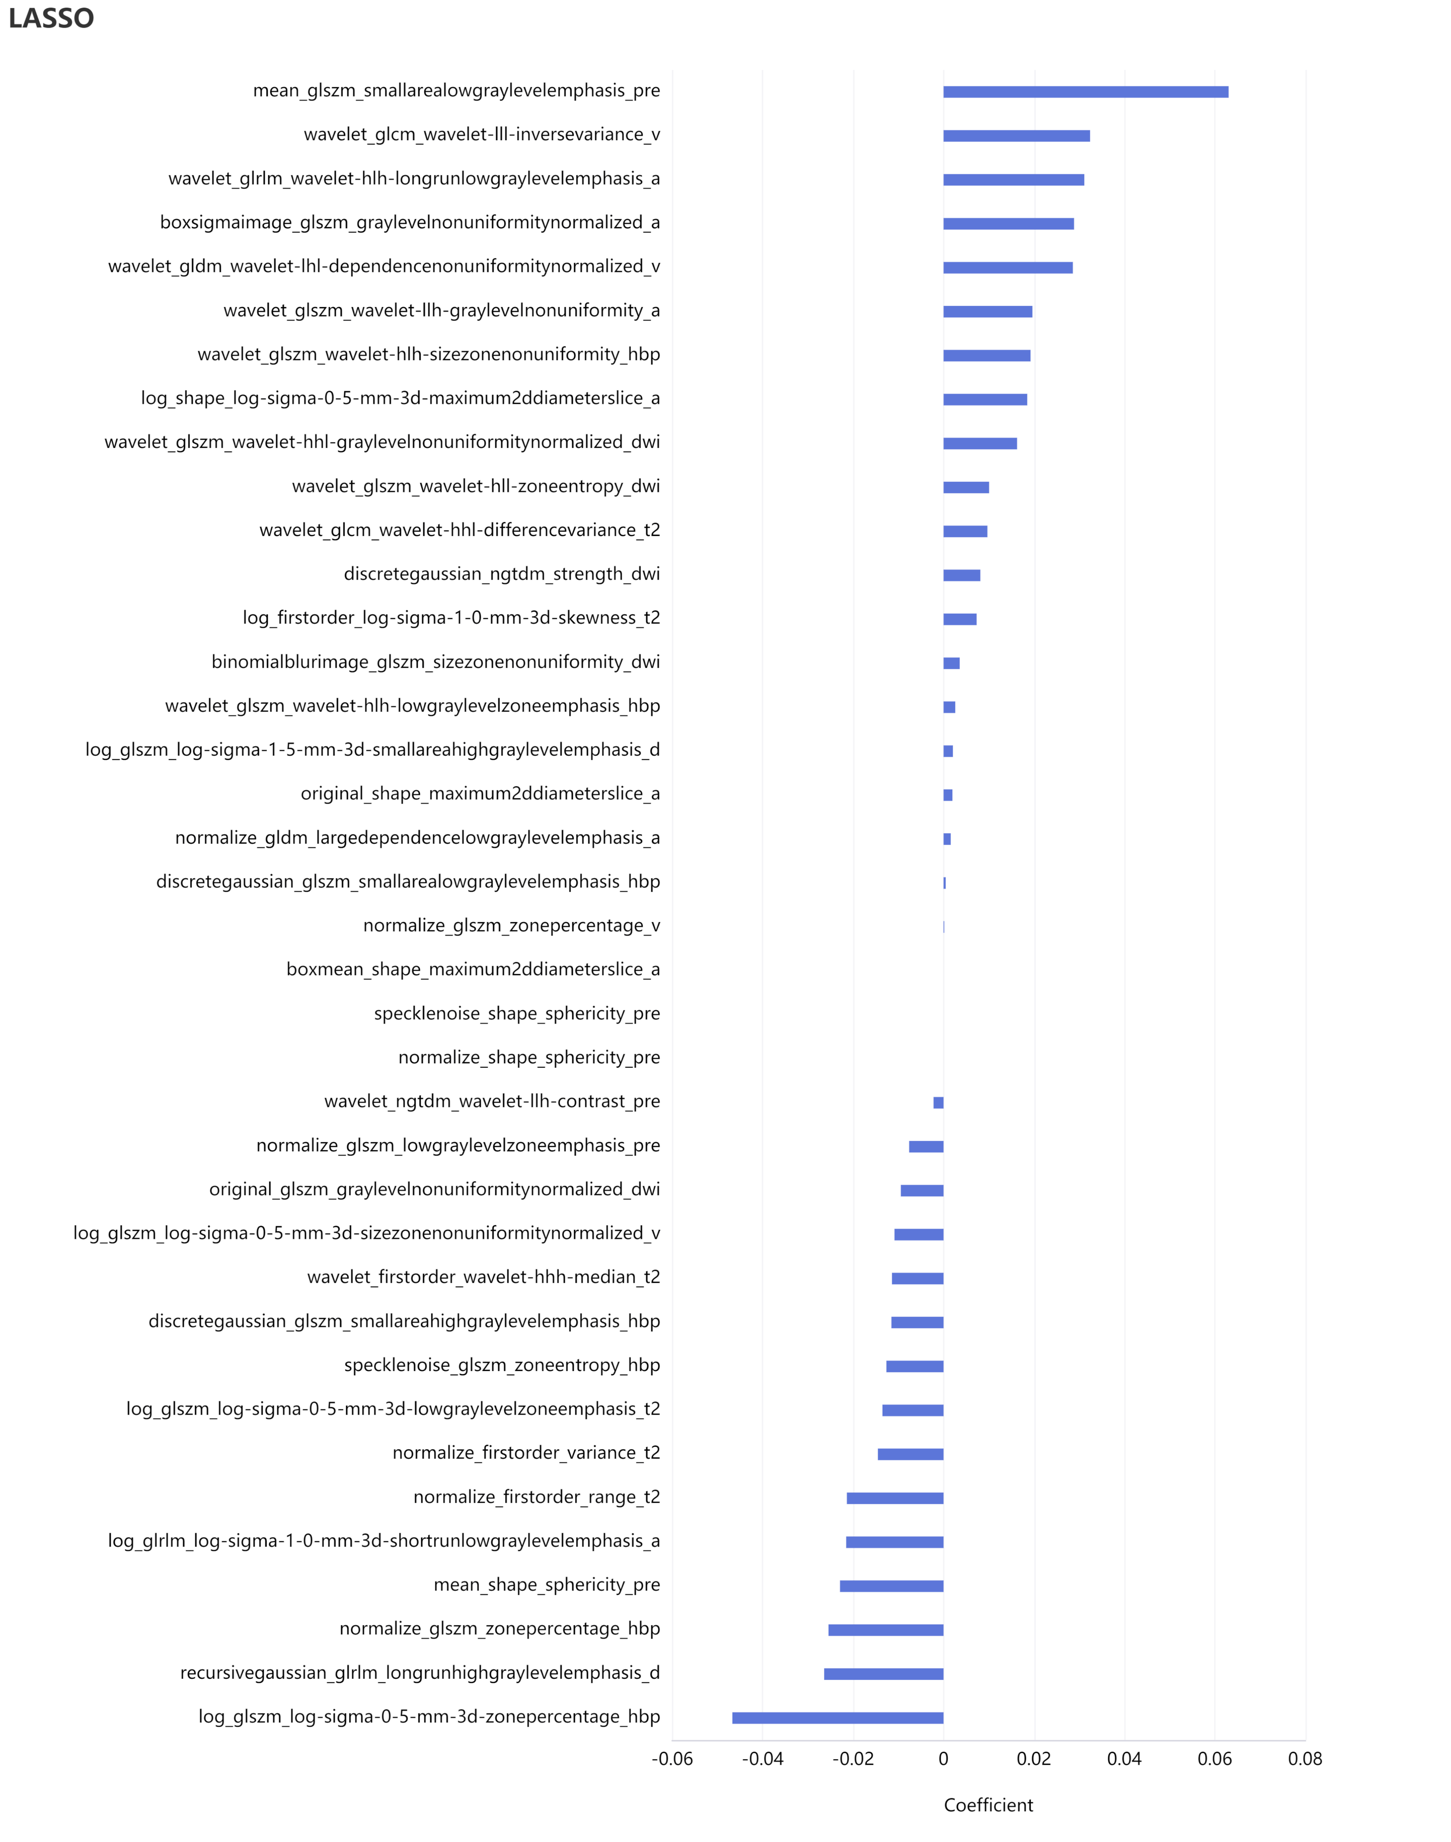
**

**Figure S1. The coefficients of 38 features of the final radiomics model.**

The 38 most recurrence-related features were extracted from 7-sequence images in the region of the whole tumor and the peritumoral region within 10 mm, and were used to develop the final radiomics model. The coefficient of these 38 radiomics features were derived from least absolute shrinkage and selection operator. Abbreviation: Laplacian of Gaussian (log), Gray Level Size Zone Matrix (glszm), Gray Level Co-occurrence Matrix (glcm), Gray Level Run Length Matrix Features (glrlm), Gray Level Dependence Matrix (gldm), Neighboring Gray Tone Difference Matrix (ngtdm). For instance, “log_glszm_log-sigmat-0-5-mm-3d-zonepercentage_hbp” feature means that the filter is log, the feature category is glszm, the radiomics feature is log-sigmat-0-5-mm-3d-zonepercentage, and the single-sequence images come from the hepatobiliary phase. Notably, the single sequence images of T2-weighted imaging, diffusion-weighted imaging, pre-contrasted phase, arterial phase, portal venous phase, delay (transitional) phase and hepatobiliary phase were abbreviated as t2, dwi, pre, a, v, d, hbp, respectively. The definition of various radiomics features is available on the official website of Pyradiomics (<https://pyradiomics.readthedocs.io/en/latest/>).

**
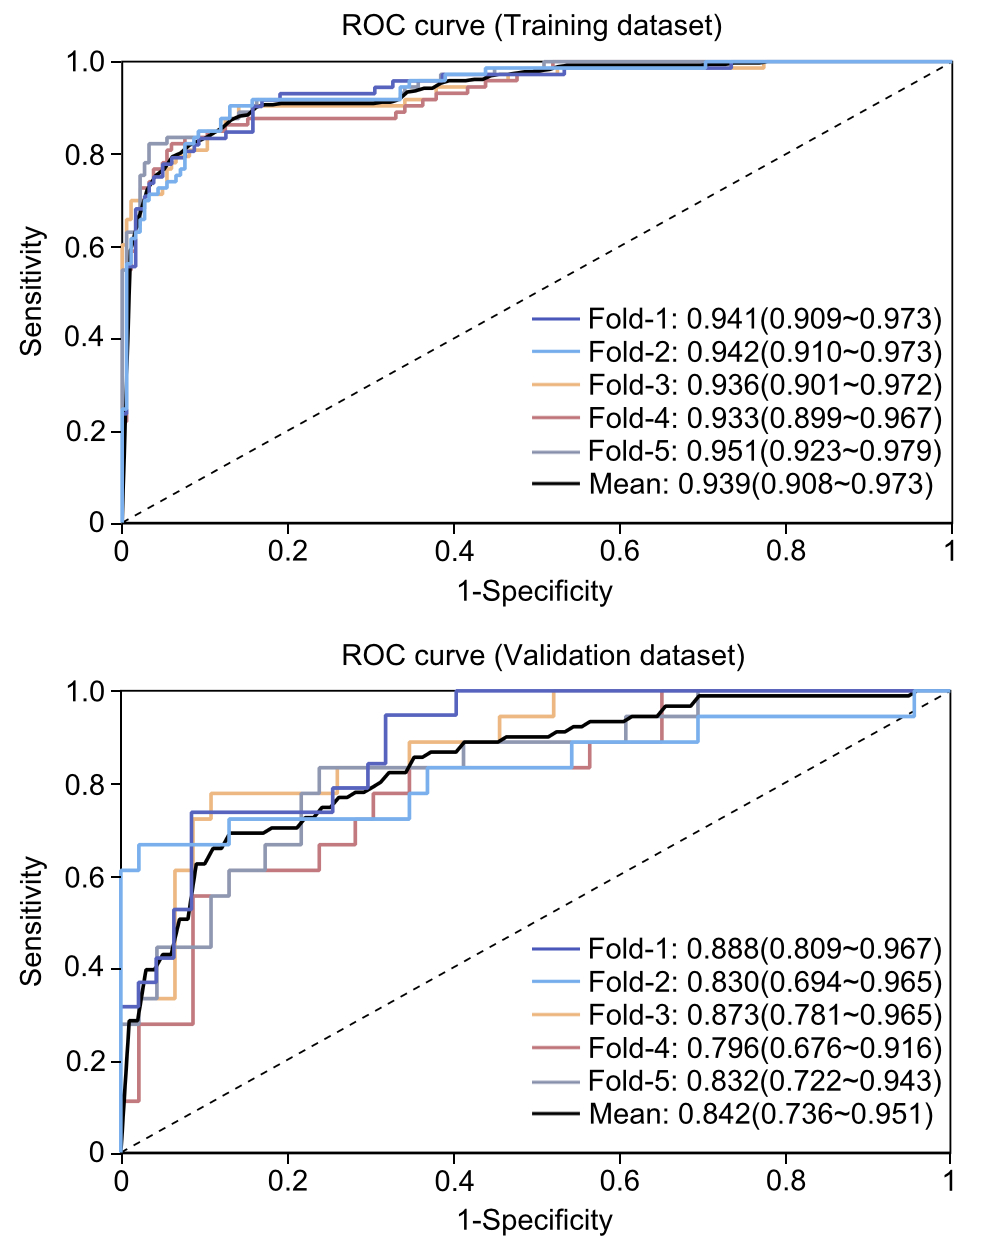
**

**Figure S2. The receiver operating characteristic curves of the peritumoral dilation radiomics model for predicting early relapse in each fold.**

The upper and bottom graphs represent the receiver operating characteristic curve (ROC) as well as its area under the curve (AUC) and 95% confidence interval (95%CI) of each fold in the training and validation cohorts, respectively. For example, “Fold-5: 0.951(0.923~0.979)” in the upper graph means that for the dataset of the fifth fold in the training cohort, the AUC and the corresponding 95%CI of the peritumoral dilation radiomics model for predicting early recrudescence is 0.951 and 0.923~0.979, respectively.
